## Latitude delineates patterns of biogeography in terrestrial *Streptomyces*

Mallory J Choudoir, James R Doroghazi, and Daniel H Buckley\*

School of Integrative Plant Sciences, Cornell University, Ithaca, NY 14853 USA

**\* Corresponding Author:** Daniel H Buckley  
[dbuckley@cornell.edu](mailto:dbuckley@cornell.edu)  
School of Integrative Plant Science  
Bradfield Hall 705, Cornell University, Ithaca, NY 14853  
607-255-1716

**Running Title:** Biogeography of *Streptomyces*

**Conflict of Interest:** None

## 1 **Originality-Significance Statement**

2 We provide the first population genetic evidence that patterns of *Streptomyces* biogeography,  
3 which manifest in geographically explicit patterns of gene flow and a latitudinal gradient of  
4 nucleotide diversity, result from dispersal limitation and regional diversification due to drift. This  
5 contribution elucidates evolutionary processes that underlie patterns of microbial biogeography.

6

## 7 **Summary**

8 We examined the biogeography of *Streptomyces* at regional spatial scales to identify factors that  
9 govern patterns of microbial diversity. *Streptomyces* are spore forming filamentous bacteria which  
10 are widespread in soil. *Streptomyces* strains were isolated from perennial grass habitats sampled  
11 across a spatial scale of more than 6,000 km. Previous analysis of this geographically explicit  
12 culture collection provided evidence for a latitudinal diversity gradient in *Streptomyces* species.  
13 Here we evaluate the hypothesis that this latitudinal diversity gradient is a result of evolutionary  
14 dynamics associated with historical demographic processes. Historical demographic phenomena  
15 have genetic consequences that can be evaluated through analysis of population genetics. We  
16 applied population genetic approaches to analyze population structure in six of the most  
17 numerically abundant and geographically widespread *Streptomyces* phylogroups from our culture  
18 collection. *Streptomyces* population structure varied at regional spatial scales and allelic diversity  
19 correlated with geographic distance. In addition, allelic diversity and gene flow are partitioned by  
20 latitude. Finally, we found that nucleotide diversity within phylogroups is negatively correlated  
21 with latitude. These results indicate that phylogroup diversification is constrained by dispersal  
22 limitation at regional spatial scales and they are consistent with the hypothesis that historical  
23 demographic processes have influenced the contemporary biogeography of *Streptomyces*.

24

25 **Introduction**

26 Patterns of microbial biogeography have been widely documented (Whitaker *et al.*, 2003; Vos and  
27 Velicer, 2008; Bissett *et al.*, 2010; Martiny *et al.*, 2011; Gilbert *et al.*, 2012; Hatosy *et al.*, 2013),  
28 and yet we are only beginning to understand the evolutionary forces that generate and maintain  
29 these patterns. Explorations of biogeography are valuable because biogeographical patterns  
30 illustrate fundamental principles of evolution and ecology. Biogeographical patterns are ultimately  
31 governed by rates of dispersal and diversification (Martiny *et al.*, 2006; Hanson *et al.*, 2012). Since  
32 microbial dispersal cannot be observed directly, rates of dispersal are typically inferred from extant  
33 patterns of genetic diversity. It has been hypothesized that microbes disperse ubiquitously due to  
34 their small cell size and massive population numbers (Finlay, 2002; Finlay and Fenchel, 2004).  
35 Yet endemism and dispersal limitation have been observed for a range of microbes (Cho and  
36 Tiedge, 2000; Green and Bohannan, 2006; Telford *et al.*, 2006; Boucher *et al.*, 2011), and microbial  
37 dispersal limitation has been verified experimentally (Bell, 2010). Contradictory findings in the  
38 literature can be explained by at least two factors: first, dispersal constraints are likely to vary with  
39 respect to different species and habitats; and second, methods used to define units of diversity vary  
40 dramatically in their taxonomic and phylogenetic resolution. Each of these factors has been  
41 discussed previously (Hanson *et al.*, 2012; Choudoir *et al.*, 2012), and we will only consider them  
42 briefly here.

43

44 Patterns of microbial dispersal and gene flow appear to differ between habitats and species. At one  
45 end of the spectrum, globally widespread microbes such as *Prochlorococcus* and *Pelagibacter*  
46 show little variation in gene content between the Atlantic and Pacific Oceans suggesting that

47 dispersal can homogenize genetic diversity in pelagic systems (Coleman and Chisholm, 2010). At  
48 the other end of the spectrum are extremophiles such as *Sulfolobus* and thermophilic  
49 *Synechococcus*, which live in island-like volcanic habitats and exhibit strong patterns of allopatric  
50 divergence resulting from dispersal limitation (Papke *et al.*, 2003; Whitaker *et al.*, 2003; Cadillo-  
51 Quiroz *et al.*, 2012). Terrestrial microbes fall somewhere between these extremes. For example,  
52 soil dwelling microbes such as *Burkholderia pseudomallei*, *Burkholderia mallei*, and *Bacillus*  
53 *anthracis* exhibit biogeographical patterns governed by dispersal limitation at regional spatial  
54 scales (Kenefic *et al.*, 2009; Pearson *et al.*, 2009).

55  
56 The phylogenetic resolution at which microbial diversity is defined can have a profound impact  
57 on our ability to discern patterns of microbial biogeography (as reviewed Hanson *et al.*, 2012).  
58 Surveys of SSU rRNA genes in terrestrial habitats indicate that environmental variables including  
59 temperature (Fierer *et al.*, 2009; Miller *et al.*, 2009), pH (Fierer and Jackson, 2006; Lauber *et al.*,  
60 2009; Rousk *et al.*, 2010), and salinity (Lozupone and Knight, 2007) are more important than  
61 geographic distance or latitude in determining spatial patterns of microbial diversity. However,  
62 SSU rRNA gene sequences have an extremely low rate of nucleotide substitution (Ochman *et al.*,  
63 1999), and microbes with similar or even identical SSU rRNA genes can have extensive genomic  
64 and ecological diversity (Welch *et al.*, 2002; Jaspers and Overmann; 2004). Thus, this marker has  
65 low sensitivity for detecting neutral processes that drive patterns of biogeography, such as dispersal  
66 limitation and genetic drift (Green and Bohannan, 2006; Hanson *et al.*, 2012). However, these  
67 neutral processes are readily explored using geographically and ecologically explicit culture  
68 collections characterized at high genetic resolution.

69

70 *Streptomyces* are ubiquitous across soil habitats, and many species are easily cultured, making this  
71 genus an excellent candidate for making a taxon-specific survey of biogeography. Furthermore,  
72 *Streptomyces* species have high rates of gene exchange both within and between species  
73 (Doroghazi and Buckley, 2010). Hence, this genus is an ideal model to explore dispersal limitations  
74 and gene flow in terrestrial systems. *Streptomyces* are gram-positive *Actinobacteria* (Kämpfer,  
75 2006) known for their complex developmental cycle, which entails filamentous growth and the  
76 formation of desiccation resistant spores which are readily dispersed (Keiser *et al.*, 2000).  
77 *Streptomyces* play a significant role in the terrestrial carbon cycle (McCarthy and Williams, 1992;  
78 Takasuka *et al.*, 2013), represent important agricultural pathogens (Loria *et al.*, 2006; Labeda,  
79 2011), and are prolific producers of antibiotics (Watve *et al.*, 2001). Despite their importance, we  
80 lack an evolutionary framework to understand *Streptomyces* biogeography.

81  
82 *Streptomyces* diversity varies spatially, though the influence of geographic distance and ecological  
83 variation remains poorly resolved. Ecological adaptation constrains the environmental distribution  
84 of *Streptomyces* and their genetic and phenotypic diversity can vary in relation to soil  
85 characteristics at small spatial scale (1 m – 60 m) in prairie soils (Davelos *et al.*, 2004a and 2004b),  
86 and in dune habitats (Antony-Babu *et al.*, 2008). There is also evidence for dispersal limitation at  
87 very large (continental) spatial scales with endemic species observed in North America and Central  
88 Asia (Wawrik *et al.*, 2007). Remarkably, genetic analysis of *Streptomyces pratensis* has revealed  
89 that strains of this species are in linkage equilibrium (i.e. random association of alleles at different  
90 loci) across a range that spans 1,000 km (Doroghazi and Buckley, 2010 and 2014). One  
91 interpretation of this finding is that *Streptomyces* are subject to widespread dispersal and unlimited  
92 gene flow at regional spatial scales. However, linkage equilibrium can also be observed for

93 dispersal limited species that have undergone a recent historical demographic range expansion  
94 (Doroghazi and Buckley, 2010 and 2014). Demographic range expansion has previously been  
95 implicated as a factor that can explain ancestral patterns of gene exchange in *Streptomyces* clades  
96 (Andam *et al.*, 2016a). Combined, these data suggest a role for both adaptive and neutral processes  
97 in governing the diversity and biogeography of *Streptomyces*, but the evolutionary interpretation  
98 of these data depends on the degree to which dispersal limitation drives patterns of diversity in  
99 *Streptomyces*.

100

101 We evaluated *Streptomyces* biogeography to explore the ecological and evolutionary forces that  
102 govern diversification within this genus. The most powerful approach for detecting evolutionary  
103 patterns that result from dispersal limitation is to examine taxon-specific biogeography patterns  
104 across ecologically similar sites. This approach controls for the effects of selection and provides a  
105 powerful test of neutral evolutionary processes (Hanson *et al.*, 2012). We constructed a taxon-  
106 specific isolate collection of *Streptomyces* found in ecologically similar grassland sites spanning  
107 the United States of America. In a study of *Streptomyces* species-level diversity, which evaluated  
108 polymorphism at a single locus (*rpoB*), we observed evidence for dispersal limitation manifesting  
109 in a latitudinal diversity gradient (Andam *et al.*, 2016b). The latitudinal diversity gradient is one  
110 of the earliest and most well documented patterns of biogeography (Wallace, 1878; Hillebrand,  
111 2004), but it is essentially undocumented in terrestrial bacterial systems. We hypothesize that  
112 historical demographic phenomena associated with Pleistocene glaciation generated the latitudinal  
113 gradient of *Streptomyces* species diversity (Andam *et al.*, 2016b). This hypothesis predicts that  
114 dispersal and gene flow will be limited and discontinuous across latitudes which correspond to the  
115 maximal extent of historical glaciation. The hypothesis also predicts that intra-species diversity

116 will vary with latitude as a consequence of limited time for diversification in northern latitudes.  
117 These hypotheses are best addressed using population genetic approaches. Here we test these  
118 specific predictions by using multilocus sequence analysis (MLSA) to characterize population-  
119 level patterns of gene flow and genetic diversity within six phylogroups of *Streptomyces* which are  
120 distributed widely across the United States.

121

## 122 **Results**

### 123 *Characterization of Streptomyces phylogroups*

124 We identified a total of 308 isolates representing the six targeted phylogroups, and these isolates  
125 spanned 13 sites (Table 1). Strains within phylogroups share 99.4-100% SSU rRNA gene sequence  
126 identity, and all strains share greater than 97% nucleotide identity in their SSU rRNA gene  
127 sequences (Figure S1). Strains within phylogroups also share 97.6%-99.5% average nucleotide  
128 identity (ANI) across concatenated MLSA loci, and all strains share greater than 88% ANI (Figure  
129 1, Table 2). The pattern of genetic ancestry as determined by population structure analysis (see  
130 Structure analysis, Experimental Procedures) is congruent with phylogroup boundaries (Figure  
131 S2), and this indicates that these phylogroups approximate biological populations. We observed  
132 122 unique MLSA haplotypes, with each phylogroup represented by 13-26 haplotypes (Figure 1,  
133 Table 2). Good's coverage for each of the six phylogroups ranges from 0.88-1.0 for individual loci  
134 and 0.94-1.0 for concatenated MLSA loci clustered at 99% nucleotide identity (Table S1). Hence,  
135 allelic diversity and nucleotide diversity are well sampled (Table S1), though unique haplotypes  
136 remain under sampled (Figure S3). The per site nucleotide diversity ( $\pi$ ) of each phylogroup ranges  
137 from 0.0026 to 0.011 (Table 2).

138

139 Four of the phylogroups do not match any *Streptomyces* species described in PubMLST (less than  
140 97% ANI across MLSA loci, Figure S4A) (Jolley *et al.*, 2004). While the other two, phylogroups  
141 WA1063 and MS152 belong to the *S. griseus* species cluster (Rong and Huang, 2010). Isolates in  
142 phylogroup WA1063 share greater than 99% MLSA identity with *S. anulatus* and *S. praecox* and  
143 form a monophyletic clade with these type strains (Figure S4A). Isolates in phylogroup MS152  
144 share greater than 98% MLSA identity with *S. mediolani*, *S. albovinaceus*, and *S. griseinus* and  
145 form a paraphyletic clade that includes these type strains (Figure S4A).

146

147 We find evidence of horizontal gene transfer consistent with previous observations of *Streptomyces*  
148 species (Doroghazi and Buckley, 2010; Andam *et al.*, 2016a). There is significant phylogenetic  
149 incongruence between MLSA loci (Figure S4, Table S2), suggesting that inter-species horizontal  
150 gene transfer has shaped the phylogeny of these groups. The six phylogroups exhibit evidence of  
151 population structure with each phylogroup composed of  $3.2 \pm 0.8$  (mean  $\pm$  s.d.) subpopulations  
152 and with evidence for admixture (Figure 1). Evidence of admixture suggests horizontal gene  
153 transfer within phylogroups and is consistent with previous evidence of gene exchange in  
154 *Streptomyces* (Doroghazi and Buckley, 2010). Evidence of recombination within phylogroups  
155 MAN196, MS200, MS152, and F34 (PHI test,  $p < 0.05$ , Table 2) further supports the conclusion  
156 of gene exchange within populations. Furthermore, the standard index of association ( $I_A$ ) is 0.09  
157 for MAN125 suggesting a freely recombining population in linkage equilibrium (Table 2). In  
158 addition, phylogroups WA1063 and MS152 share two identical *atpD* alleles (Figure S4B), but it is  
159 not clear whether these alleles are shared as a result of contemporary horizontal gene transfer or  
160 vertical inheritance from the most recent common ancestor of the two clades. The latter  
161 explanation is more parsimonious given the low level of polymorphism between phylogroups



162 WA1063 and MS152. We do not observe evidence of inter-group horizontal gene transfer between  
163 these six phylogroups.

164

#### 165 *Evidence for dispersal limitation*

166 Strains of the six phylogroups were obtained from soil samples from 13 sites of diverse geographic  
167 origin (Table 1). Each phylogroup was detected in  $4.2 \pm 0.4$  sites, and this distribution differs  
168 significantly from expectations for a random distribution of strains across sites (permutation test,  
169  $p < 0.0005$ ), thereby rejecting the hypothesis of panmixia (*i.e.* the ability of organisms to move  
170 freely across habitats). Each phylogroup subpopulation was observed in  $2.2 \pm 0.9$  sites (mean  $\pm$   
171 s.d.), and this value is lower than expected if subpopulations are randomly distributed across the  
172 sites occupied by each phylogroup (permutation test,  $p < 0.001$ ). These results indicate that  
173 phylogroup distribution is constrained geographically and that phylogroups have subpopulation  
174 structure that is also geographically explicit.

175

176 The geographic distribution of *Streptomyces* alleles indicates dispersal limitation. Identical alleles  
177 are shared among phylogroup members across each phylogroup's geographic range, which can  
178 exceed 5,000 km (Figure 2, Table 1). However, dissimilarity in allele composition increases with  
179 geographic distance, and this result is significant (Bray-Curtis dissimilarity, Mantel  $r = 0.29$ ,  $p =$   
180  $0.005$ ) (Figure S5). Hence, alleles are more likely shared between geographically similar sites  
181 indicating dispersal limitation with potential for long range dispersal. This result is significant for  
182 all individual loci except *recA* (Bray-Curtis dissimilarity, *aptD* Mantel  $r = 0.31$ ,  $p = 0.004$ ; *gyrB*  $r$   
183  $= 0.22$ ,  $p = 0.031$ ; *recA*  $r = 0.16$ ,  $p = 0.088$ ; *rpoB*  $r = 0.27$ ,  $p = 0.004$ ; *trpB*  $r = 0.19$ ,  $p = 0.047$ ). In  
184 addition, all MLSA haplotypes (Figure 1, Figure 3) are unique to a single site, with the sole

185 exception being a haplotype from phylogroup MS200 which is observed in both MS and WI (Sun  
186 Prairie).

187

188 Analysis of haplotype distribution is consistent with diversification due to dispersal limitation. We  
189 used nested clade analysis (NCA) combined with a rigorous statistical framework to evaluate  
190 population structure and demography (see Experimental Procedures). NCA establishes significant  
191 phylogeographic inferences for phylogroups MAN196, MAN125, WA1063, and MS152 (Figure  
192 3) but not for MS200 and F34. Nested clade phylogeographic inference postulates potential  
193 evolutionary and historical demographic processes that support extant patterns of diversity and  
194 biogeography (see legend of Figure 3). For instance, population subdivision of MAN125 across  
195 the Pacific Northwest (Figure 3A) and MAN196 between Maine and the Pacific Northwest (Figure  
196 3B) is consistent with restricted gene flow due to historical long distance dispersal events.  
197 Likewise, population subdivision of MS152 and between the Southeast (MS and FL) and CA  
198 (Figure 3C) and WA1063 between WI (Brookfield) and OR (Figure 3D) is consistent with  
199 allopatric fragmentation.

200

### 201 *Latitudinal diversity gradient*

202 The distribution and diversity of the phylogroups reveals a latitudinal diversity gradient. Strains  
203 from MAN125, MAN196, WA1063 occur mostly north of 40°N latitude, while strains from  
204 MS200, MS152, F34 occur mostly south of this latitude (Table 1, Figure 2). This pattern of  
205 North/South partitioning is significant for each phylogroup when evaluated against the expectation  
206 of a random distribution across sites (permutation test,  $p < 0.01$  for each phylogroup after  
207 Bonferroni correction). Furthermore, partial Mantel tests were performed to evaluate the latitudinal

208 and longitudinal vector components of geographic distance in relation to the allele composition of  
209 sites. There remains a significant relationship between allele composition and geographic distance  
210 when we control for longitude, (Mantel  $r = 0.23$ ,  $p = 0.022$ ), but this relationship is no longer  
211 significant when we control for latitude (Mantel  $r = 0.15$ ,  $p = 0.12$ ). This result indicates that allele  
212 composition changes more across latitude than it does across longitude. The latitudinal partitioning  
213 of alleles can be readily observed in the pattern of allele sharing between sites (Figure 2). Finally,  
214 we also observed a significant relationship between per site nucleotide diversity of phylogroup  
215 MLSA loci and the average latitude of sites in which they are found ( $R = -0.91$ ,  $p = 0.012$ ; Figure  
216 4). This result indicates phylogroups recovered from lower latitudes have higher genetic diversity  
217 than those recovered from higher latitudes.

218

## 219 **Discussion**

220 We used population genetic approaches to analyze spatial patterns of genetic diversity for six  
221 *Streptomyces* phylogroups isolated from geographically disparate but ecologically similar sites  
222 across the United States (Table 1). The distribution of phylogroups is nonrandom and likely  
223 dispersal limited (Figure S5) with phylogroups inhabiting geographic ranges defined by latitude  
224 (Table 1, Figure 2). In addition, the genetic diversity of phylogroups is negatively correlated to the  
225 latitude from which they were isolated (Figure 4). These findings suggest that there are latitudinal  
226 barriers to dispersal, and that patterns of *Streptomyces* biogeography result from dispersal  
227 limitation and regional diversification due to genetic drift. Furthermore, these results are consistent  
228 with the hypothesis that historical demographic processes have influenced the contemporary  
229 biogeography of *Streptomyces*.

230

231 The phylogroups we describe are coherent phylogenetic groups that approximate biological  
232 populations (Figure S2). The members of each phylogroup share a distinguishable geographic  
233 range (Table 1, Figure 2), a recent common ancestor (Figure 1), and greater than 97% ANI across  
234 MLSA loci (Table 2). Despite geographic and genetic subpopulation structure (Figure 1),  
235 phylogroup members frequently share identical alleles across demes. It is worth noting that since  
236 all of the strains examined share > 97% SSU rRNA gene identity, these geographic patterns would  
237 not be detected using standard SSU rRNA analyses methods (Figure S1). We infer the presence of  
238 recombination within all phylogroups using both nucleotide polymorphism and phylogenetic  
239 methods (Table 2, Table S2).

240

241 Regional patterns of biogeography among phylogroups are consistent with limitations to dispersal  
242 and gene flow. Allopatric processes like genetic drift can drive diversification between populations  
243 that are geographically isolated. The geographic distribution of our phylogroups is nonrandom,  
244 and we find regional subpopulation structure within phylogroups (Figure 1, Figure 3). Although  
245 we find identical alleles in sites thousands of kilometers apart (Figure 2, Figure S4), MLSA  
246 haplotypes are not shared across sites (with the single exception of a haplotype shared between  
247 MS and WI) (Figure 3). We also observe a significant distance decay relationship for MLSA allele  
248 composition and geographic distance between sites (Figure S5). Distance decay relationships  
249 driven by neutral processes can be challenging to identify given that environmental variables are  
250 often spatially structured (Nekola and White, 1999). However, Andam *et al.* (2016b) shows that  
251 *Streptomyces* community phylogenetic diversity across sites correlates significantly with latitude  
252 and temperature but not with soil pH, soil organic matter, or rainfall. Hence, it is unlikely that these  
253 coarse environmental variables determine regional population structure. This data implies that

254 while gene flow is moderate across the geographic range of a phylogroup, dispersal limitation and  
255 genetic drift create appreciable regional population structure.

256

257 *Streptomyces* phylogroup diversity is consistent with a latitudinal diversity gradient. While the  
258 classical description of a latitudinal diversity gradient defines diversity at the level of species  
259 richness, these diversity gradients are also apparent at the level of intra-species genetic diversity  
260 (Hadly, 2013). We find that latitude is a significant predictor of gene flow (Figure 2). Furthermore,  
261 intra-phylogroup nucleotide diversity has a significant negative relationship with average latitude  
262 (Figure 4), which is congruous with the latitudinal diversity gradient observed for diverse  
263 macroorganisms (Hadly, 2013; Hillebrand, 2004). There is conflicting evidence for latitudinal  
264 diversity gradients among microorganisms. Evidence for microbial latitudinal diversity gradients  
265 comes from marine systems (Fuhrman *et al.*, 2008; Sul *et al.*, 2013; Swan *et al.*, 2013), with  
266 contrary evidence obtained in terrestrial systems (Neufeld and Mohn, 2005; Chu *et al.*, 2010).  
267 However, most analyses of terrestrial bacterial biogeography are derived from analyses of SSU  
268 rRNA genes, and we show that analyses of SSU rRNA genes lack the sensitivity needed to detect  
269 the biogeographic patterns that we observe for *Streptomyces* (Figure S1).

270

271 Several hypotheses have been advanced to explain the formation of latitudinal diversity gradients  
272 (Wiens and Donoghue, 2004; Mittelbach *et al.*, 2007). Ecological hypotheses posit that factors  
273 such as carrying capacity, productivity, and niche availability vary across latitude and that these  
274 factors impose constraints on biodiversity (Currie *et al.*, 2004; Mouchet *et al.*, 2015). Evolutionary  
275 hypotheses invoke the positive relationship between temperature and the kinetics of metabolism  
276 to predict that evolutionary rates and cladogenesis correspond with temperature (Allen *et al.*,

277 2002). Historical hypotheses propose that the latitudinal diversity gradient is the product of  
278 historical geological, ecological, or demographic events that have influenced dispersal and  
279 diversification (Wiens and Donoghue, 2004; Stevens, 2006). For example, the influence of  
280 Pleistocene glacial events on the biogeography of diverse species of terrestrial and aquatic plants  
281 and animals is well documented, with postglacial range expansion giving rise to the latitudinal  
282 partitioning of populations and species, and resulting in decreased molecular variation of northern  
283 lineages relative to southern ancestral lineages (Soltis *et al.*, 1997; Bernatch and Wilson, 1998;  
284 Conroy and Cook, 2000; Milá *et al.*, 2006; Maggs *et al.*, 2008; Wilson and Veraguth, 2010). There  
285 is also evidence that Pleistocene glaciation events have impacted both microbial communities  
286 (Eisenlord *et al.*, 2012) and populations (Kenefic *et al.*, 2009; Mikheyev *et al.*, 2008).

287

288 The biogeography of our *Streptomyces* phylogroups is consistent with the hypothesis that historical  
289 demography and dispersal limitation have produced the latitudinal diversity gradient that we  
290 observe. For instance, MAN125 is nearly in linkage equilibrium ( $I_A = 0.09$ ) though its members  
291 span a geographic range of over 2,000 km across the Pacific Northwest. Similar patterns of  
292 recombination have also been observed in a *S. pratensis* population which spanned 1,000 km  
293 across sites present in North Carolina and northern New York (Doroghazi and Buckley, 2010 and  
294 2014). The observation of linkage equilibrium indicates that either the population lacks  
295 contemporary barriers to gene flow or the population has experienced a recent historical  
296 demographic expansion. Coupled with evidence of limitations to gene flow at regional scales  
297 (Figure 2, Figure S5), the most parsimonious explanation for these conflicting observations is a  
298 recent historical demographic range expansion. Conversely, latitudinal gradients in marine  
299 bacterial diversity have been attributed to correlations between temperature and the kinetics of

300 metabolism (Fuhrman *et al.*, 2008). This kinetic effect has been hypothesized to increase  
301 evolutionary tempo and speciation rates in tropical latitudes and would be expected to generate  
302 latitudinal gradients of both species diversity and nucleotide diversity (Allen *et al.*, 2002). Since  
303 latitude is correlated with temperature, we cannot completely dismiss the influence of kinetics as  
304 a cause of the intra-group latitudinal gradient of genetic diversity in terrestrial *Streptomyces*.  
305 However, the kinetic effects of temperature cannot account for partitioning of gene flow across  
306 latitude, while in contrast, this is a specific prediction of the historical demography hypothesis. It  
307 is possible, however, that unappreciated ecological variables, such as the species composition of  
308 perennial grass communities, could shape the diversity gradient. Ultimately, it is likely that  
309 latitudinal diversity gradients can arise from a combination of ecological, evolutionary, and  
310 historical processes that vary in their relative influence with respect to different species and  
311 different habitats.

312

313 Evidence for a latitudinal diversity gradient coupled with evidence of contemporary dispersal  
314 limitation following historical demographic expansion, while not conclusive, suggests that  
315 phylogenetic niche conservatism has contributed to the formation of the *Streptomyces* latitudinal  
316 diversity gradient. Phylogenetic niche conservatism can cause diversity gradients when  
317 contemporary species distributions are determined by historical climate regimes (Wiens and  
318 Donoghue, 2004; Stevens, 2006). Climactic regimes oscillate widely across geologic time scales  
319 and these historical changes in climate produce demographic phenomena that impact the  
320 evolutionary dynamics of species. In particular, the genetic consequences of glaciation events are  
321 described in depth by Hewitt (1996, 2000, and 2004). The population structure we observe in our  
322 *Streptomyces* phylogroups is consistent with the effects of post-glacial demographic range

323 expansion followed by dispersal limitation and regional diversification. Dispersal limitation may  
324 occur following range expansion as a result of density dependent blocking or by adaptive barriers  
325 that arise after the colonization of new habitat. One of the expectations of post-glacial expansion  
326 is “southern richness versus northern purity” (Hewitt, 2004). This is evident in the negative  
327 correlation we observe between latitude and the nucleotide diversity of phylogroups (Figure 4).  
328 Similar relationships between intraspecific nucleotide diversity and average latitude as result of  
329 post-glacial colonization are evident in other systems (Bernatchez and Wilson, 1998). Williams *et*  
330 *al.* (1998) justifies 40°N latitude as approximating late Pleistocene glacial and non-glacial regions  
331 with respect to species distributions in North America. Hence, the latitudinal delineation of allele  
332 distributions for *Streptomyces* phylogroups roughly corresponds to the extent of ice coverage  
333 during the late Pleistocene (Figure 2), which suggests historical population expansion from lower  
334 to higher latitudes.

335  
336 Haplotype distributions of phylogroups MAN125, MAN196, WA1063, and MS152 are consistent  
337 with allopatric diversification resulting from dispersal limitation (Figure 3). Haplotype nested  
338 clade analysis (NCA) predicts that historical dispersal events and range expansion across northern  
339 regions resulted in limits on dispersal during intermediate timescales, allowing genetic drift to  
340 create the phylogroup population structures observed today. There is moderate criticism of NCA  
341 (Knowles and Maddison, 2002; Nielsen and Beumont, 2009) due to the subjective nature of  
342 inferring historical processes and the wide potential for stochastic processes creating similar  
343 patterns of biogeography. Yet these tools can provide useful hypotheses. Northern phylogroups  
344 MAN125 and MAN196 share a common ancestor with southern phylogroups MS200 and F34  
345 (Figure 1). The contemporary population structure of MAN125 and MAN196 is consistent with a



346 historical range expansion from a common ancestor shared by both clades (Figure 1, Figure 3).  
347 Further population structure within each phylogroup likely resulted from barriers to gene flow and  
348 historical dispersal events across the Pacific Northwest for MAN125 (Figure 3A) and between  
349 Maine and the Pacific Northwest for MAN196 (Figure 3B). Analysis of haplotype distribution  
350 within WA1063 and MS152 is also consistent with diversification of populations as a result of  
351 gene flow limitation between the Midwest and Pacific Northwest for WA1063 (Figure 3D) and  
352 between the Southeast and West for MS152 (Figure 3C).

353

354 Phylogroups WA1063 and MS152 share a recent common ancestor (Figure 1, Figure S2) and also  
355 share two identical alleles at the *atpD* locus (Figure S4B). These phylogroups have distinct, non-  
356 overlapping geographic ranges with WA1063 found in higher latitudes and MS152 in lower  
357 latitudes (Table 1, Figure 2). WA1063 and MS152 have 0.0205 net nucleotide substitutions per  
358 site across concatenated MLSA loci. We evaluate the possible time range for divergence between  
359 WA1063 and MS152 by extrapolating very roughly from the nucleotide substitution rate ( $\mu =$   
360  $4.5 \times 10^{-9}$ ) and generation time (100-300 generations per year) for *E. coli* (Ochman *et al.*, 1999),  
361 since corresponding values are not available for *Streptomyces* or their relatives. Based upon these  
362 gross approximations, we would estimate that WA1063 and MS152 diverged 15,000-50,000 years  
363 ago, corresponding to events in the late Pleistocene (Clayton *et al.*, 2006). Hence, it is likely that  
364 the identical *atpD* alleles found in both WA1063 and MS152 were inherited from a shared  
365 ancestral population (Figure S3B) as opposed to inheritance from contemporary gene exchange.

366

367 Through population genetic analysis of six *Streptomyces* phylogroups, we find evidence for  
368 dispersal limitation associated with geographically explicit patterns of gene flow which manifest

369 in a latitudinal gradient of nucleotide diversity. Furthermore, these data support the hypothesis that  
370 historical demographic processes influence the contemporary biogeography of *Streptomyces*. Due  
371 to their spore forming capabilities and potential for long range dispersal, *Streptomyces* are an ideal  
372 system for assessing limits on gene flow among terrestrial bacteria. Future research should seek to  
373 determine the degree to which dispersal limitation is due to limits on spore mobility, density  
374 dependent blocking, or a result of adaptive constraints relating to phylogenetic niche conservatism.  
375 A better understanding of *Streptomyces* biogeography and the evolutionary forces that govern  
376 *Streptomyces* diversification may ultimately assist in the discovery of novel genetic diversity and  
377 possibly novel antibiotics within this genus.

378

## 379 **Experimental Procedures**

### 380 *Strain isolation and DNA extraction*

381 We previously assembled a culture collection of more than 1,000 *Streptomyces* from 15 sites across  
382 the United States with soil sampled at 0-5 cm depth (Andam *et al.*, 2016b). Sites were selected to  
383 represent a narrow range of ecological characteristics including meadow, pasture, or native  
384 grasslands dominated by perennial grasses and having moderately acidic soil (pH:  $6.0 \pm 1.0$ ; ave.  
385  $\pm$  s.d.). Strains were isolated using uniform conditions and this will select for strains having similar  
386 physiological characteristics. The analysis of physiologically similar strains from ecologically  
387 similar sites improves our ability to detect biogeographical patterns that result from drift by  
388 minimizing the importance of selection (as reviewed by Hanson *et al.*, 2012). Soil was air dried,  
389 and *Streptomyces* strains were isolated on glycerol-arginine agar plates of pH 8.7 containing  
390 cycloheximide and Rose Bengal (El-Nakeeb and Lechevalier, 1963; Ottow, 1972) as previously  
391 described (Doroghazi and Buckley, 2010). Genomic DNA was extracted for each isolate from

392 purified cultures, which were grown by shaking at 30°C in liquid yeast extract-malt extract medium  
393 (YEME) containing 0.5% glycine (Kieser *et al.*, 2000), by using a standard  
394 phenol/chloroform/isoamyl alcohol protocol (Roberts and Crawford, 2000).

395

396 The gene encoding the RNA polymerase beta-subunit (*rpoB*) provides a robust, advantageous  
397 alternative to the SSU rRNA locus for phylogenetic analyses of the genera *Streptomyces* (Kim *et*  
398 *al.*, 2004). We previously assessed genetic diversity of our culture collection using partial *rpoB*  
399 sequences clustered at 0.01 patristic distances with RAMI (Pommier *et al.*, 2009), and using this  
400 approach we identified 107 species-like phylogenetic clusters, or phylogroups (Andam *et al.*,  
401 2016b). We selected six of these phylogroups for further analysis. These six phylogroups had the  
402 highest numerical abundance and widest geographical distribution in our isolate collection,  
403 representing 308 strains isolated across 13 sites (and representing 308 of the 755 strains isolated  
404 from these 13 sites). MLSA was performed on 17-47 isolates from each phylogroup. Phylogroup  
405 names are capitalized and based on a representative isolate; for example, phylogroup WA1063 is  
406 named for *Streptomyces* sp. wa1063. Isolates are identified with a lowercase letter code indicating  
407 site of origin followed by a strain number; for example, isolate wa1063 is strain 1063 isolated from  
408 Washington (WA) state.

409

#### 410 *Multilocus sequence analysis (MLSA)*

411 We adapted the MLSA scheme developed for *Streptomyces* by Guo *et al.* (2008), which targets the  
412 five housekeeping loci *atpD*, *gyrB*, *recA*, *rpoB*, and *trpB* as described in Doroghazi and Buckley  
413 (2010) (Table S3). The V2 and V2 regions of SSU rRNA sequences were amplified using universal  
414 primers 8F and 1492R (Table S3). Reactions for Sanger sequencing were performed using forward

415 primers for all loci except *rpoB*, for which the reverse primer was used. Trace files were uniformly  
416 screened using CAP3 (Huang and Madan, 1999), and sequences were trimmed as to discard  
417 nucleobases with a Phred quality score below 23. Sequences were aligned using MUSCLE (Edgar,  
418 2004), trimmed to 431 bp, 415 bp, 446 bp, 557 bp, and 489 bp, for genes *atpD*, *gyrB*, *recA*, *rpoB*,  
419 *trpB*, respectively, and concatenated consistently with the genomic order in *Streptomyces*  
420 *coelicolor* A3(2). SSU rRNA sequences were trimmed to 357 bp, creating an alignment spanning  
421 the V1 and V2 regions. Gene sequences are available on GenBank with accession numbers  
422 KX110408-KA111380.

423  
424 Good's coverage estimation and haplotype rarefaction was determined using mothur (Schloss *et*  
425 *al.*, 2009). DNA polymorphism statistics including, number of segregating sites, nucleotide  
426 diversity, and Tajima's D, were determined with DnaSP v5 (Librado and Rozas, 2009) and LDhat  
427 (McVean *et al.*, 2002). Population scaled mutation rates (Watterson's theta;  $\theta_w = 2N_e\mu$ ),  
428 recombination or gene conversion rates ( $\rho = 2N_e r/2$ ), and relative rates of recombination ( $\rho/\theta_w$ ) were  
429 estimated using LDhat (McVean *et al.*, 2002) and are expressed per nucleotide site. The standard  
430 index of association ( $I_A$ ) was calculated from allelic data with LIAN v3.5 (Haubold and Hudson,  
431 2000) using the Monte-Carlo test and 100 iterations. The pairwise homoplasy index (PHI) statistic  
432 was determined using PhiPack (Bruen *et al.*, 2006), and statistical significance was evaluated  
433 under a null hypothesis of no recombination. Sequence identity across phylogroups was calculated  
434 with mothur (Shloss *et al.*, 2009)

435

#### 436 *Phylogenetic reconstruction*

437 Maximum likelihood (ML) trees were constructed from the nucleotide sequences of individual and

438 concatenated MLSA loci using the generalized time reversible nucleotide substitution model  
439 (Tavaré, 1986) with gamma distributed rate heterogeneity among sites (GTRGAMMA) supported  
440 in RAxML v7.3.0 (Stamatakis, 2006). Bootstrap support was determined for the highest-scoring  
441 ML tree of 20 iterations, and the number of bootstrap replicates was determined using the extended  
442 majority rule (autoMRE) convergence criteria (Pattengale *et al.*, 2010). Root placement is defined  
443 by *Mycobacterium smegmatis*. Significant phylogenetic incongruence between loci was  
444 determined using the Shimodaira-Hasegawa test (Shimodaira and Hasegawa, 1999) implemented  
445 in the R package phangorn (Schliep, 2011).

446

#### 447 *Population structure*

448 Concatenated MLSA sequences were analyzed using Structure v2.3.3 (Pritchard *et al.*, 2000) to  
449 examine population affiliation, subdivision, and admixture within and between phylogroups.  
450 Structure was run using an admixture model with a burn-in length of  $1.0E^6$  and  $3.0E^6$  replicates.  
451 The most probable number of sub-populations (k) was evaluated with 10 independent runs and  
452 chosen using the Evanno method (Evanno *et al.*, 2005), with k = 1 through k = 6 within  
453 phylogroups and through k = 8 between phylogroups, implemented by Structure Harvester (Earl  
454 and vonHoldt, 2012). After choosing the most probable k-value, the program Clumpp was used to  
455 permute outputs of the independent runs (Jakobsson and Rosenberg, 2007).

456

#### 457 *Patterns of dispersal and gene flow*

458 We used permutation tests to evaluate whether phylogroup distribution across sites could be  
459 explained by panmixia. We compared the observed distributions to those expected under a random  
460 distribution model using 1,000 permutations to assess significance. The null model for the

461 permutation test assigned strains to sites as a random draw without replacement from the OTU  
462 table while holding the number of strains sampled at each site to be invariant. In addition,  
463 correlations between geographic distance and allele composition between sites were assessed using  
464 Mantel and partial Mantel tests (Mantel, 1967; Smouse *et al.*, 1986). These tests were performed  
465 with the R package *ecodist* (Goslee and Urban, 2007) using the Pearson correlation method and  
466 1,000 permutations. Bray-Curtis dissimilarity was calculated from allele composition across sites.  
467  
468 Haplotype networks were created using a statistical parsimony procedure (Templeton *et al.*, 1987;  
469 Templeton *et al.*, 1995) implemented in TCS v1.18 (Clement *et al.*, 2000). Nested clade  
470 information was used to infer processes that could explain the geographic and genetic distribution  
471 of sequences using the program GeoDis v2.2 (Posada *et al.*, 2000). Both TCS v1.18 and GeoDis  
472 v2.2 were performed in ANeCA (Panchal, 2007).

473

#### 474 **Acknowledgements**

475 This material is based upon work supported by the National Science Foundation under  
476 Grants No. DEB-1050475 and DEB-1456821. We would like to thank Ashley Campbell for her  
477 help in generating MLSA sequences.

478

#### 479 **References**

480 Allen AP, Brown JH, Gillooly JF. (2002) Global biodiversity, biochemical kinetics, and the  
481 energetic-equivalence rule. *Science* **297**: 1545–1548.

482

483 Adams RI and Hadly EA. (2013) Genetic diversity within vertebrate species is greater at lower  
484 latitudes. *Evol Ecol* **27**: 113-143.

485

486 Andam CP, Choudoir MJ, Nguygen AV, Park HS, Buckley DH. (2016a) Contributions of  
487 ancestral inter-species recombination to the genetic diversity of extant *Streptomyces* lineages.  
488 ISMEJ In Press. doi: 10.1038/ismej.2015.230.

489

490 Andam CP, Doroghazi JR, Campbell AN, Kelly PJ, Choudoir MJ, Buckley DH. (2016b). A  
491 latitudinal diversity gradient in terrestrial bacteria of the genus *Streptomyces*. *mBio* **7**: e02200-  
492 15.

493

494 Antony-Babu S, Stach JEM, Goodfellow M. (2008) Genetic and phenotypic evidence for  
495 *Streptomyces griseus* ecovars isolated from a beach and dune sand system. *Antonie Van*  
496 *Leeuwenhoek* **94**: 63–74.

497

498 Bell T. (2010) Experimental tests of the bacterial distance-decay relationship. *ISME J* **4**: 1357–  
499 1365.

500

501 Bernatchez L, Wilson CC. (1998) Comparative phylogeography of Nearctic and Palearctic  
502 fishes. *Mol Ecol* **7**: 431–452.

503

- 504 Bissett A, Richardson AE, Baker G, Wakelin S, Thrall PH. (2010) Life history determines  
505 biogeographical patterns of soil bacterial communities over multiple spatial scales. *Mol Ecol* **19**:  
506 4315–4327.
- 507
- 508 Boucher Y, Cordero OX, Takemura A, Hunt DE, Schliep K, Baptiste E, *et al.* (2011) Local  
509 mobile gene pools rapidly cross species boundaries to create endemism within global *Vibrio*  
510 *cholerae* populations. *mBio* **2**: e00335–10.
- 511
- 512 Bruen TC, Philippe H, Bryant D. (2005) A simple and robust statistical test for detecting the  
513 presence of recombination. *Genetics* **172**: 2665–2681.
- 514
- 515 Cadillo-Quiroz H, Didelot X, Held NL, Herrera A, Darling A, Reno ML, *et al.* (2012) Patterns of  
516 gene flow define species of thermophilic Archaea. *PLoS Biol* **10**: e1001265.
- 517
- 518 Cho J, Tiedje JM. (2000) Biogeography and degree of endemism of fluorescent *Pseudomonas*  
519 strains in soil. *Appl Environ Microbiol* **66**: 5448-5456.
- 520
- 521 Choudoir MJ, Campbell AN, Buckley DH. (2012) Grappling with Proteus: population level  
522 approaches to understanding microbial diversity. *Front Microbiol* **3**: 336.
- 523
- 524 Chu H, Fierer N, Lauber CL, Caporaso JG, Knight R, Grogan P. (2010) Soil bacterial diversity in  
525 the Arctic is not fundamentally different from that found in other biomes. *Environ Microbiol* **12**:  
526 2998–3006.



527

528 Clayton L, Attig JW, Mickelson DM, Johnson MD, Syverson KM. (2006) Glaciation of  
529 Wisconsin: Wisconsin Geological and Natural History Survey Educational Series 36. Wisconsin  
530 Geological and Natural History Survey. Madison, WI.

531

532 Clement M, Posada D, Crandall KA. (2000) TCS: A computer program to estimate gene  
533 genealogies. *Mol Ecol* **9**: 1657–1659.

534

535 Coleman ML, Chisholm SW. (2010) Ecosystem-specific selection pressures revealed through  
536 comparative population genomics. *Proc Natl Acad Sci U S A* **107**: 18634–18639.

537

538 Conroy CJ, Cook JA. (2000) Phylogeography of a post-glacial colonizer: *Microtus longicaudus*  
539 (Rodentia: Muridae). *Mol Ecol* **9**: 165–175.

540

541 Currie DJ, Mittelbach GG, Cornell HV, Field R, Guégan JF, Hawkins BA, *et al.* (2004)  
542 Predictions and tests of climate-based hypotheses of broad-scale variation in taxonomic richness.  
543 *Ecol Lett* **7**: 1121–1134.

544

545 Davelos AL, Xiao K, Samac DA, Martin AP, Kinkel LL. (2004a) Spatial variation in  
546 *Streptomyces* genetic composition and diversity in a prairie soil. *Microb Ecol* **48**: 601–612.

547

548 Davelos AL, Kinkel LL, Samac DA. (2004b) Spatial variation in frequency and intensity of  
549 antibiotic interactions among *Streptomyces* from prairie soil. *Appl Environ Microbiol* **70**:  
550 1051–1058.  
551

552 Doroghazi JR, Buckley DH. (2014) Intraspecies comparison of *Streptomyces pratensis* genomes  
553 reveals high levels of recombination and gene conservation between strains of disparate  
554 geographic origin. *BMC Genomics* **15**: 970.  
555

556 Doroghazi JR, Buckley DH. (2010) Widespread homologous recombination within and between  
557 *Streptomyces* species. *ISME J* **4**: 1136–1143.  
558

559 Earl DA, vonHoldt BM. (2012) STRUCTURE HARVESTER: a website and program for  
560 visualizing STRUCTURE output and implementing the Evanno method. *Conserv Genet Resour*  
561 **4**: 359–361.  
562

563 Edgar RC. (2004) MUSCLE: multiple sequence alignment with high accuracy and high  
564 throughput. *Nucleic Acid Res* **32**: 1792–1797.  
565

566 Eisenlord SD, Zak DR, Upchurch RA. (2012) Dispersal limitation and the assembly of soil  
567 *Actinobacteria* communities in a long-term chronosequence. *Ecol Evol* **2**: 538–549.  
568

569 El-Nakeeb MA, Lechevalier HA. (1963) Selective isolation of aerobic Actinomycetes. *Appl*  
570 *Microbiol* **11**: 75–77.

571

572 Evanno G, Regnaut S, Goudet J. (2005) Detecting the number of clusters of individuals using the  
573 software STRUCTURE: a simulation study. *Mol Ecol* **14**: 2611–2620.

574

575 Fierer N, Carney KM, Horner-Devine MC, Megonigal JP. (2009) The biogeography of  
576 ammonia-oxidizing bacterial communities in soil. *Microb Ecol* **58**: 435–445.

577

578 Fierer N, Jackson RB. (2006) The diversity and biogeography of soil bacterial communities. *Proc*  
579 *Natl Acad Sci U S A* **103**: 626–631.

580

581 Finlay BJ. (2002) Global dispersal of free-living microbial eukaryote species. *Science* **296**:  
582 1061–1063.

583

584 Finlay BJ, Fenchel T. (2004) Cosmopolitan metapopulations of free-living microbial eukaryotes.  
585 *Protist* **155**: 237–244.

586

587 Fuhrman JA, Steele JA, Hewson I, Schwalbach MS, Brown M V, Green JL, *et al.* (2008) A  
588 latitudinal diversity gradient in planktonic marine bacteria. *Proc Natl Acad Sci U S A* **105**: 7774–  
589 7778.

590

591 Gilbert JA, Steele JA, Caporaso JG, Steinbrück L, Reeder J, Temperton B, *et al.* (2012) Defining  
592 seasonal marine microbial community dynamics. *ISME J* **6**: 298–308.

593

594 Goslee SC, Urban DL. (2007) The ecodist package for dissimilarity-based analysis of ecological  
595 data. *J Stat Softw* **22**: 1–19.

596

597 Green J, Bohannan BJM. (2006) Spatial scaling of microbial biodiversity. *Trends Ecol Evol* **21**:  
598 501–507.

599

600 Guo Y, Zheng W, Rong X, Huang Y. (2008) A multilocus phylogeny of the *Streptomyces*  
601 *griseus* 16S rRNA gene clade: use of multilocus sequence analysis for streptomycete  
602 systematics. *Int J Syst Evol Microbiol* **58**: 149–159.

603

604 Hanson CA, Fuhrman JA, Horner-Devine MC, Martiny JBH. (2012) Beyond biogeographic  
605 patterns: processes shaping the microbial landscape. *Nat Rev Microbiol* **10**: 497–506.

606

607 Hatosy SM, Martiny JBH, Sachdeva R, Steele J, Fuhrman JA, Martiny AC. (2013) Beta diversity  
608 of marine bacteria depends on temporal scale. *Ecology* **94**: 1898–1904.

609

610 Haubold B, Hudson RR. (2000) LIAN 3.0: detecting linkage disequilibrium in multilocus data.

611 *Bioinformatics* **16**: 847–848.

612

613 Hewitt GM. (1996) Some genetic consequences of ice ages, and their role in divergence and  
614 speciation. *Biol J Linnean Soc* **58**: 247–276.

615

616 Hewitt G. (2000) The genetic legacy of the Quaternary ice ages. *Nature* **405**: 907–913.

617

618 Hewitt GM. (2004) Genetic consequences of climatic oscillations in the Quaternary. *Philos Trans*  
619 *R Soc Lond B Biol Sci* **359**: 183–195.

620

621 Hillebrand H. (2014) On the generality of the latitudinal diversity gradient. *Amer Nat* **163**: 192–  
622 211.

623

624 Huang X, Madan A. (1999) CAP3: a DNA sequence assembly program. *Genome Res* **9**: 868–  
625 677.

626

627 Jakobsson M, Rosenberg NA. (2007) CLUMPP: a cluster matching and permutation program for  
628 dealing with label switching and multimodality in analysis of population structure.  
629 *Bioinformatics* **23**: 1801–1806.

630

631 Jaspers E, Overmann J. (2004) Ecological significance of microdiversity: identical 16S rRNA  
632 gene sequences can be found in bacteria with highly divergent genomes and ecophysologies.  
633 *Appl Environ Microbiol* **70**: 4831–4839.

634

635 Jolley KA, Chan MS, Maiden MCJ. (2004) mlstdbNet - distributed multi-locus sequence typing  
636 (MLST) databases. *BMC Bioinformatics* **5**: 86.

637

- 638 Kämpfer P. (2006) The family *Streptomycetaceae* Part I: Taxonomy. In: The Prokaryotes,  
639 Volume 3. Dworkin, M, Falkow, S, Rosenberg, E, Schliefer, K, & Stackebrandt, E. (eds). New  
640 York: Springer, pp. 538–604.  
641
- 642 Kenefic LJ, Pearson T, Okinaka RT, Schupp JM, Wagner DM, Hoffmaster AR, *et al.* (2009) Pre-  
643 Columbian origins for North American anthrax. PLoS One **4**: e4813.  
644
- 645 Kieser T, Bibb M, Buttner M, Charter K, Hopwood D. (2000) Practical *Streptomyces* Genetics.  
646 Norwich, UK: John Innes Foundation.  
647
- 648 Kim BJ, Kim CJ, Chun J, Koh YH, Lee SH, Hyun JW, *et al.* (2004) Phylogenetic analysis of the  
649 genera *Streptomyces* and *Kitasatospora* based on partial RNA polymerase beta-subunit gene  
650 (*rpoB*) sequences. Int J Syst Evol Microbiol. **54**: 593–598.  
651
- 652 Knowles L, Maddison W. (2002) Statistical phylogeography. Mol Ecol **11**: 2623–2635.  
653
- 654 Labeda DP. (2011) Multilocus sequence analysis of phytopathogenic species of the genus  
655 *Streptomyces*. Int J Syst Evol Microbiol **61**: 2525–2531.  
656
- 657 Lauber CL, Hamady M, Knight R, Fierer N. (2009) Pyrosequencing-based assessment of soil pH  
658 as a predictor of soil bacterial community structure at the continental scale. Appl Environ  
659 Microbiol **75**: 5111–5120.  
660

- 661 Librado P, Rozas J. (2009) DnaSP v5: a software for comprehensive analysis of DNA  
662 polymorphism data. *Bioinformatics* **25**: 1451–1452.  
663
- 664 Loria R, Kers J, Joshi M. (2006) Evolution of plant pathogenicity in *Streptomyces*. *Annu Rev*  
665 *Phytopathol* **44**: 469–487.  
666
- 667 Lozupone CA, Knight R. (2007) Global patterns in bacterial diversity. *Proc Natl Acad Sci U S A*  
668 **104**: 11436–11440.  
669
- 670 Maggs CA, Castilho R, Foltz D, Henzler C, Jolly MT, Kelly J, *et al.* (2008) Evaluating  
671 signatures of glacial refugia for North Atlantic benthic marine taxa. *Ecology* **89**: S108–S122.  
672
- 673 Mantel N. (1967) The detection of disease clustering and a generalized regression approach.  
674 *Cancer Research* **27**: 209–220.  
675
- 676 Martiny JBH, Bohannan BJM, Brown JH, Colwell RK, Fuhrman JA, Green JL, *et al.* (2006)  
677 Microbial biogeography: putting microorganisms on the map. *Nat Rev Microbiol* **4**: 102–112.  
678
- 679 Martiny JBH, Eisen JA, Penn K, Allison SD, Horner-Devine MC. (2011) Drivers of bacterial  $\beta$  -  
680 diversity depend on spatial scale. *Proc Natl Acad Sci U S A* **108**: 7850–7854.  
681
- 682 McCarthy AJ, Williams ST. (1992) Actinomycetes as agents of biodegradation in the  
683 environment - a review. *Gene* **115**: 189–192.

684

685 McVean G, Awadalla P, Fearnhead P. (2002) A coalescent-based method for detecting and  
686 estimating recombination from gene sequences. *Genetics* **160**: 1231–1241.

687

688 Mikheyev AS, Vo T, Mueller UG. (2008) Phylogeography of post-Pleistocene population  
689 expansion in a fungus-gardening ant and its microbial mutualists. *Mol Ecol* **17**: 4480–4488.

690

691 Mila B, Smith T, Wayne R. (2006) Postglacial population expansion drives the evolution of  
692 long-distance migration in a songbird. *Evolution* **60**: 2403–2409.

693

694 Miller SR, Strong AL, Jones KL, Ungerer MC. (2009) Bar-coded pyrosequencing reveals shared  
695 bacterial community properties along the temperature gradients of two alkaline hot springs in  
696 Yellowstone National Park. *Appl Environ Microbiol* **75**: 4565–4572.

697

698 Mittelbach GG, Schemske DW, Cornell H V., Allen AP, Brown JM, Bush MB, *et al.* (2007)  
699 Evolution and the latitudinal diversity gradient: speciation, extinction and biogeography. *Ecol*  
700 *Lett* **10**: 315–331.

701

702 Mouchet M, Levers C, Zupan L, Kuemmerle T, Plutzer C, Erb K, *et al.* (2015) Testing the  
703 effectiveness of environmental variables to explain European terrestrial vertebrate species  
704 richness across biogeographical scales. *PLoS One* **10**: e0131924.

705



706 Nekola JC and White PS. (1999) The distance decay similarity in biogeography and ecology. *J*  
707 *Biogeogr* **26**: 867-878.  
708

709 Neufeld JD, Mohn WW. (2005) Unexpectedly high bacterial diversity in arctic tundra relative to  
710 boreal forest soils, revealed by serial analysis of ribosomal sequence tags. *Appl Environ*  
711 *Microbiol* **71**: 5710–5718.  
712

713 Nielsen R, Beaumont MA. (2009) Statistical inferences in phylogeography. *Mol Ecol* **18**: 1034–  
714 1047.  
715

716 Ochman H, Elwyn S, Moran NA. (1999) Calibrating bacterial evolution. *Proc Natl Acad Sci U S*  
717 *A* **96**: 12638–12643.  
718

719 Ottow JCG. (2013) Rose bengal as a selective aid in the isolation of fungi and Actinomycetes  
720 from natural sources. *Mycologia* **64**: 304–315.  
721

722 Panchal M. (2006) The automation of Nested Clade Phylogeographic Analysis. *Bioinformatics*  
723 **23**: 509–510.  
724

725 Papke RT, Ramsing NB, Bateson MM, Ward DM. (2003) Geographical isolation in hot spring  
726 cyanobacteria. *Environ Microbiol* **5**: 650–659.  
727

728 Pattengale ND, Alipour M, Bininda-Emonds ORP, Moret BME, Stamatakis A. (2010) How  
729 many bootstrap replicates are necessary? *J Comput Biol* **17**: 337–354.  
730  
731 Pearson T, Giffard P, Beckstrom-Sternberg S, Auerbach R, Hornstra H, Tuanyok A, *et al.* (2009)  
732 Phylogeographic reconstruction of a bacterial species with high levels of lateral gene transfer.  
733 *BMC Biol* **7**: 78.  
734  
735 Pommier T, Canback B, Lundberg P, Hagstrom A, Tunlid A. (2009) RAMI: a tool for  
736 identification and characterization of phylogenetic clusters in microbial communities.  
737 *Bioinformatics* **25**: 736–742.  
738  
739 Posada D, Crandall KA, Templeton AR. (2000) GeoDis: A program for the cladistic nested  
740 analysis of the geographical distribution of genetic haplotypes. *Mol Ecol* **9**: 487–488.  
741  
742 Pritchard JK, Stephens M, Donnelly P. (2000) Inference of population structure using multilocus  
743 genotype data. *Genetics* **155**: 945–959.  
744  
745 Roberts MA and Crawford DL. (2000) Use of randomly amplified polymorphic DNA as a means  
746 of developing genus- and strain-specific *Streptomyces* DNA probes. *Appl Environ Microbiol* **66**:  
747 2555-2564.  
748

749 Rong X, Huang Y. (2010) Taxonomic evaluation of the *Streptomyces griseus* clade using  
750 multilocus sequence analysis and DNA-DNA hybridization, with proposal to combine 29 species  
751 and three subspecies as 11 genomic species. *Int J Syst Evol Microbiol* **60**: 696–703.  
752

753 Rousk J, Bååth E, Brookes PC, Lauber CL, Lozupone C, Caporaso JG, *et al.* (2010) Soil  
754 bacterial and fungal communities across a pH gradient in an arable soil. *ISME J* **4**: 1340–1351.  
755

756 Schliep KP. (2011) phangorn: phylogenetic analysis in R. *Bioinformatics* **27**: 592–593.  
757

758 Schloss PD, Westcott SL, Ryabin T, Hall JR, Hartmann M, Hollister EB, *et al.* (2009)  
759 Introducing mothur: open-source, platform-independent, community-supported software for  
760 describing and comparing microbial communities. *Appl Environ Microbiol* **75**: 7537–7541.  
761

762 Shimodaira H, Hasegawa M. (1999) Multiple comparisons of log-likelihoods with applications  
763 to phylogenetic inference. *Mol Biol Evol* **16**: 1114–1116.  
764

765 Smouse PE, Long JC, Sokal RR. (1986) Multiple regression and correlation extensions of the  
766 Mantel test of matrix correspondence. *Syst Zool* **35**: 627–632.  
767

768 Soltis D, Gitzendanner M, Strenge D, Soltis P. (1997) Chloroplast DNA intraspecific  
769 phylogeography of plants from the Pacific Northwest of North America. *Plant Syst Evol* **206**:  
770 353–373.  
771

- 772 Stamatakis A. (2006) RAxML-VI-HPC: maximum likelihood-based phylogenetic analyses with  
773 thousands of taxa and mixed models. *Bioinformatics* **22**: 2688–2690.  
774
- 775 Stevens RD. (2006) Historical processes enhance patterns of diversity along latitudinal gradients.  
776 *Proc R Soc B Biol Sci* **273**: 2283–2289.  
777
- 778 Sul WJ, Oliver TA, Ducklow HW, Amaral-zettler LA, Sogin ML. (2012) Marine bacteria exhibit  
779 a bipolar distribution. *Proc Natl Acad Sci U S A* **110**: 2342–2347.  
780
- 781 Swan BK, Tupper B, Sczyrba A, Lauro FM, Martinez-Garcia M, González JM, *et al.* (2013)  
782 Prevalent genome streamlining and latitudinal divergence of planktonic bacteria in the surface  
783 ocean. *Proc Natl Acad Sci U S A* **110**: 11463–11468.  
784
- 785 Takasuka TE, Book AJ, Lewin GR, Currie CR, Fox BG. (2013) Aerobic deconstruction of  
786 cellulosic biomass by an insect-associated *Streptomyces*. *Sci Rep* **3**: 1–10.  
787
- 788 Tavaré S. (1986) Some probabilistic and statistical problems in the analysis of DNA sequences.  
789 *Am Math Soc Lect Math Life Sci* **17**: 57–86.  
790
- 791 Telford RJ, Vandvik V, Birks HJB. (2006) Dispersal limitations matter for microbial  
792 morphospecies. *Science* **312**: 1015.  
793

- 794 Templeton AR, Boerwinkle E, Sing CF. (1987) A cladistic analysis of phenotypic associations  
795 with haplotypes inferred from restriction endonuclease mapping. i. basic theory and an analysis  
796 of alcohol dehydrogenase activity in *Drosophila*. *Genetics* **117**: 343–351.  
797
- 798 Templeton AR, Routman E, Phillips CA. (1995) Separating population structure from population  
799 history: a cladistic analysis of the geographical distribution of mitochondrial DNA haplotypes in  
800 the tiger salamander, *Ambystoma tigrinum*. *Genetics* **140**: 767–782.  
801
- 802 Vos M, Velicer GJ. (2008) Isolation by distance in the spore-forming soil bacterium  
803 *Myxococcus xanthus*. *Curr Biol* **18**: 386–391.  
804
- 805 Wallace A. (1878) *Tropical nature, and other essays*. London: Macmillan and Co.  
806
- 807 Watve M, Tickoo R, Jog M, Bhole B. (2001) How many antibiotics are produced by the genus  
808 *Streptomyces*? *Arch Microbiol* **176**: 386–390.  
809
- 810 Wawrik B, Kutliev D, Abdivasievna UA, Kukor JJ, Zylstra GJ, Kerkhof L. (2007) Biogeography  
811 of Actinomycete communities and type ii polyketide synthase genes in soils collected in New  
812 Jersey and Central Asia. *Appl Environ Microbiol* **73**: 2982–2989.  
813
- 814 Welch RA, Burland V, Plunkett G, Redford P, Roesch P, Rasko D, *et al.* (2002) Extensive  
815 mosaic structure revealed by the complete genome sequence of uropathogenic *Escherichia coli*.  
816 *Proc Natl Acad Sci U S A* **99**: 17020–17024.

817

818 Whitaker RJ, Grogan DW, Taylor JW. (2003) Geographic barriers isolate endemic populations

819 of hyperthermophilic archaea. *Science* **301**: 976–978.

820

821 Wiens JJ, Donoghue MJ. (2004) Historical biogeography, ecology and species richness. *Trends*

822 *Ecol Evol* **19**: 639–644.

823

824 Williams D, Dunkerley D, DeDecker P, Kershaw P, Chappell M. (1998) Quaternary

825 environments. London: Arnold.

826

827 Wilson AB, Veraguth IE. (2010) The impact of Pleistocene glaciation across the range of a

828 widespread European coastal species. *Mol Ecol* **19**: 4535–53.

## Table and Figure Legends

**Table 1.** A total of 755 *Streptomyces* strains were isolated from 13 sites, and 308 of these strains were found to represent the six targeted phylogroups. The numbers of isolates per site that belonged to each of our target phylogroups is indicated. Isolate names begin with a letter code referring to the sample site.

| Site                   | Code | Latitude | Longitude | Altitude | Isolates/<br>Site | Isolates from <i>Streptomyces</i> sp. phylogroup |            |            |           |           |     |
|------------------------|------|----------|-----------|----------|-------------------|--------------------------------------------------|------------|------------|-----------|-----------|-----|
|                        |      |          |           |          |                   | MAN<br>125                                       | MAN<br>196 | WA<br>1063 | MS<br>200 | MS<br>152 | F34 |
| Manley Hot Springs, AK | man  | 63.87°N  | -149.02°W | 452 m    | 95                | 51                                               | 26         | 1          |           |           |     |
| Denali Hwy, AK         | den  | 63.22°N  | -147.68°W | 894 m    | 40                | 40                                               |            |            |           |           |     |
| Bothell, WA            | wa   | 47.73°N  | -122.24°W | 132 m    | 105               | 21                                               | 5          | 21         |           |           |     |
| Astoria, OR            | or   | 46.18°N  | -123.85°W | 40 m     | 79                |                                                  | 8          | 7          |           |           |     |
| Kennebunk, ME          | me   | 43.4°N   | -70.54°W  | 28 m     | 85                |                                                  | 13         |            |           |           |     |
| Sun Prairie, WI        | sun  | 43.17°N  | -89.24°W  | 289 m    | 65                | 3                                                |            |            | 3         |           |     |
| Brookfield, WI         | b    | 43.06°N  | -88.13°W  | 277 m    | 22                |                                                  |            | 5          |           |           |     |
| Palo Alto, CA          | st   | 37.43°N  | -122.17°W | 24 m     | 34                |                                                  |            |            |           | 2         | 1   |
| Greensboro, NC         | gb   | 36.09°N  | -79.89°W  | 276 m    | 9                 |                                                  | 1          |            |           | 2         |     |
| Troy, NC               | uw   | 35.71°N  | -79.88°W  | 194 m    | 19                |                                                  | 4          |            | 7         |           |     |
| Starkville, MS         | ms   | 33.46°N  | -88.8°W   | 119 m    | 90                |                                                  |            |            | 11        | 8         | 2   |
| Austin, TX             | t    | 30.2°N   | -97.77°W  | 199 m    | 42                |                                                  |            |            |           |           | 6   |
| Fort Pierce, FL        | f    | 27.54°N  | -80.35°W  | 0 m      | 70                |                                                  |            |            | 7         | 5         | 48  |
| <b>Total</b>           |      |          |           |          | 755               | 115                                              | 57         | 34         | 28        | 17        | 57  |

**Table 2.** MLSA was performed on a total of 17-47 strains from each phylogroup. Summary statistics for concatenated MLSA nucleotide sequences were determined as described in methods. Phylogroup average latitude (Ave Lat) was determined using the total number of isolates per phylogroup provided in Table 1. The standard index of association is zero for a population in linkage equilibrium.

| Phylo-group | Ave Lat | n  | Haplo-types | Min ANI | S  | $\pi$  | Tajima's D | $\theta_w$ | $\rho$  | $\rho/\theta_w$ | $I_A$ | $\Phi_w$    |
|-------------|---------|----|-------------|---------|----|--------|------------|------------|---------|-----------------|-------|-------------|
| MAN125      | 60.15°N | 45 | 25          | 99.5    | 23 | 0.0026 | 0.53       | 0.0023     | 0.0094  | 4.18            | 0.09  | 2.95E-01    |
| MAN196      | 52.84°N | 47 | 26          | 98.5    | 65 | 0.0075 | 0.67       | 0.0063     | 0.00043 | 0.068           | 0.49  | 4.24E-02*   |
| WA1063      | 47.20°N | 19 | 13          | 98.1    | 63 | 0.0052 | -1.35      | 0.0077     | 0       | 0               | 0.43  | 4.33E-03    |
| MS200       | 33.58°N | 27 | 21          | 98.4    | 93 | 0.0088 | -0.58      | 0.0103     | 0.0017  | 0.17            | 0.39  | 1.33E-03**  |
| MS152       | 32.50°N | 17 | 15          | 97.6    | 96 | 0.0107 | -0.51      | 0.012      | 0.0013  | 0.11            | 0.35  | 1.078E-01** |
| F34         | 28.20°N | 36 | 22          | 97.7    | 93 | 0.0109 | 0.52       | 0.0096     | 0.0011  | 0.11            | 0.46  | 1.79E-01**  |

Ave Lat: average latitude of phylogroup members

n: number of isolates subsampled for MLSA

Min ANI: minimum percent pairwise average nucleotide identity (ANI) within phylogroup members

S: segregating sites

$\pi$ : per site nucleotide diversity

$\theta_w$ : per site Watterson's theta ( $2N_e\mu$ )

$\rho$ : per site rate of recombination/gene conversion ( $2N_e r/2$ )

$\rho/\theta_w$ : relative rate of recombination to mutation

$I_A$ : standard index of association

$\Phi_w$ : pairwise homoplasy index (Phi) statistic with  $p$ -value < 0.05\*, 0.01\*\* under the null hypothesis of no recombination





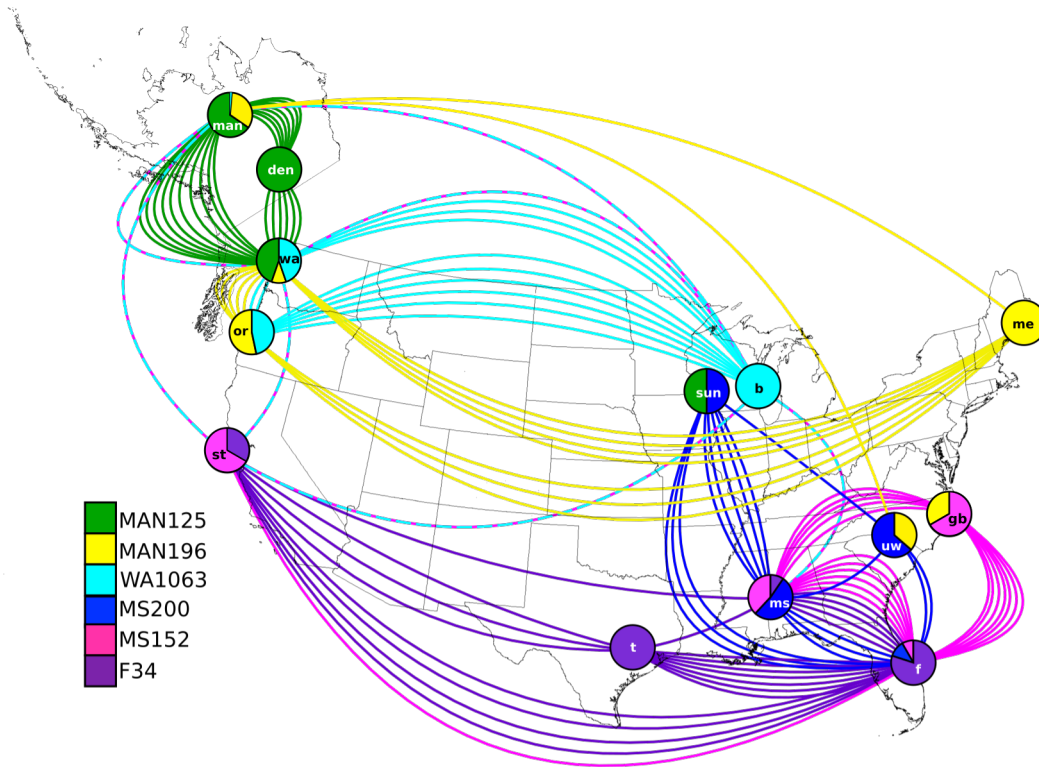

**Figure 2.** Circles depict sample sites and are labeled according to site code (Table 1). The relative abundance of each phylogroup at each site is indicated by color according to the legend, with raw counts provided in Table 1. Solid colored lines represent identical alleles shared by phylogroup members subsampled for MLSA across sites. Dashed multicolored lines depict identical *atpD* alleles shared by strains in phylogroups WA1063 and MS152 (Figure S4B).

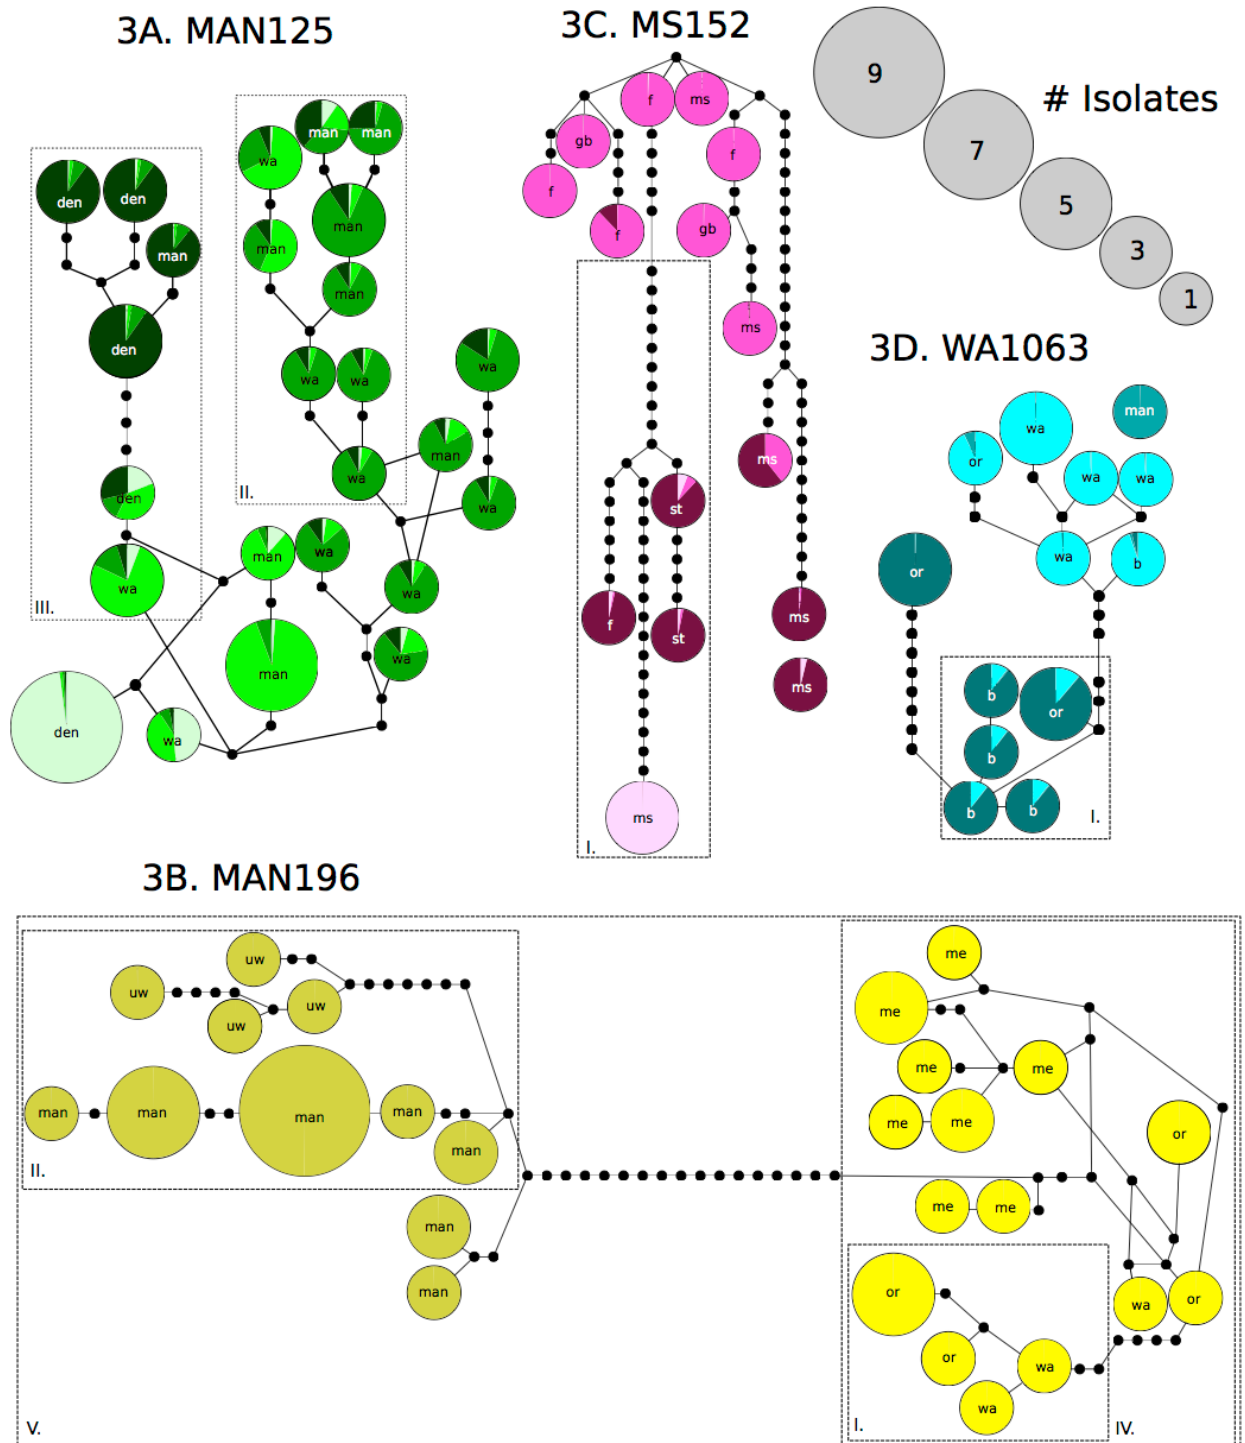

**Figure 3.** Haplotype networks for phylogroups MAN125 (3A), MAN196 (3B), MS152 (3C), WA1063 (3D). Circles represent MLSA haplotypes whose radius is proportional to the number of isolates having that haplotype, and colors correspond to strain ancestry and subpopulation affiliation as determined by Structure analysis and defined in Figure 1. Haplotypes are labeled with a letter code referring to sample site location as indicated in Table 1 (all haplotypes for MAN125,

MAN196, MS152, and WA1063 are found exclusively at a single site). Black circles represent un-sampled, inferred haplotypes with each circle designating a single nucleotide polymorphism. The length of edges between nodes is uninformative. Dashed rectangles encompass clades that have significant phylogeographic inferences from nested clade analysis, as described in methods. Roman numerals correspond to the following inferences: I. Allopatric fragmentation; II. Long distance colonization and/or past fragmentation; III. Restricted gene flow with isolation by distance; IV. Restricted gene flow but with some long-distance gene flow over intermediate ranges not occupied by the species; or past gene flow followed by extinction of intermediate populations; V. Contiguous range expansion.

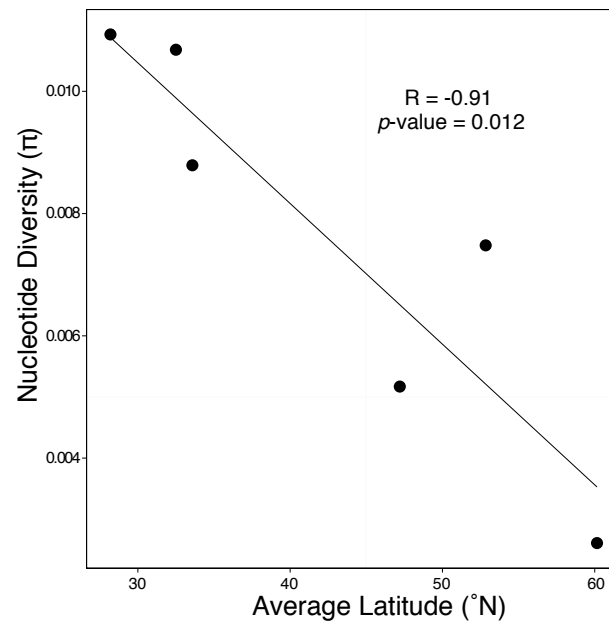

**Figure 4.** Average latitude was determined using a weighted average based on the total number of isolates per site as indicated in Table 1. Nucleotide diversity was calculated using concatenated MLSA loci and is expressed per site.
